# Supplementary material for: Differentially expressed microRNAs in lung adenocarcinoma invert effects of copy number aberrations of prognostic genes
Source: PubMed Central journal article supplement (PMC5823624; doi:10.18632/oncotarget.24070), 2018-01-08
Supplement: oncotarget-09-9137-s001.pdf [file oncotarget-09-9137-s001.pdf]

**Supplementary Table 1: List of paradoxical genes with their chromosomal location, along with robust rank score and expression status as obtained from integrative gene expression analysis**

See Supplementary File 1

Supplementary Table 2: List of deregulated miRNAs along with their expressions obtained from TCGA miRNAseq data

| miRNA         | Integrative analysis |        | TCGA expression: |             |
|---------------|----------------------|--------|------------------|-------------|
|               | Corr. score          | Status | logFC            | Adj. P-val. |
| hsa-mir-126   | 2.91E-07             | down   | -0.03            | 8.63E-01    |
| hsa-mir-130b* | 2.07E-03             | up     | 1.86             | 8.00E-29    |
| hsa-mir-135b* | 1.15E-03             | up     | 2.94             | 1.08E-29    |
| hsa-mir-139*  | 9.36E-04             | down   | -1.87            | 4.82E-25    |
| hsa-mir-143*  | 3.72E-03             | down   | -1.96            | 2.20E-24    |
| hsa-mir-144*  | 1.83E-02             | down   | -2.56            | 2.08E-21    |
| hsa-mir-145   | 2.38E-05             | down   | -0.59            | 1.04E-03    |
| hsa-mir-16    | 4.85E-02             | down   | 0.62             | 4.33E-06    |
| hsa-mir-182*  | 3.19E-09             | up     | 2.69             | 1.19E-53    |
| hsa-mir-183*  | 1.59E-05             | up     | 2.52             | 1.08E-43    |
| hsa-mir-191   | 2.02E-02             | up     | 0.95             | 1.07E-12    |
| hsa-mir-195*  | 3.22E-03             | down   | -1.58            | 1.16E-27    |
| hsa-mir-196a* | 3.58E-02             | up     | 3.49             | 1.26E-12    |
| hsa-mir-196b* | 3.43E-02             | up     | 2.13             | 2.12E-08    |
| hsa-mir-200a* | 4.14E-02             | up     | 2.29             | 4.54E-34    |
| hsa-mir-200b* | 1.67E-02             | up     | 1.20             | 4.31E-11    |
| hsa-mir-21*   | 8.32E-14             | up     | 2.92             | 6.24E-85    |
| hsa-mir-210*  | 5.59E-09             | up     | 5.26             | 3.30E-59    |
| hsa-mir-218*  | 1.39E-04             | down   | -1.34            | 1.66E-22    |
| hsa-mir-30a*  | 4.00E-05             | down   | -1.83            | 5.63E-22    |
| hsa-mir-31*   | 3.42E-02             | up     | 2.62             | 4.05E-12    |
| hsa-mir-34c   | 3.74E-02             | down   | -0.97            | 6.26E-03    |
| hsa-mir-486*  | 8.16E-03             | down   | -3.57            | 2.48E-39    |
| hsa-mir-9*    | 9.67E-06             | up     | 4.49             | 1.50E-30    |

Asterisks next to a miRNA name indicates miRNAs validated in the TCGA LUAD data.

**Supplementary Table 3: Evaluation of the prognostic properties of the 70 validated paradoxical genes**

See Supplementary File 1

**Supplementary Data 1: Frequencies and statistical significance of the CNAs as obtained from the integrative analysis of the three aCGH datasets**

See Supplementary File 2

**Supplementary Data 2: Results of the robust-rank integrative analysis of the gene expression datasets**

See Supplementary File 3

**Supplementary Data 3: Results of the robust-rank meta-analysis of the miRNA expression reports**

See Supplementary File 4

**Supplementary Data 4: Results of the pathway enrichment analysis as obtained from pathDIP**

See Supplementary File 5
